# Supplementary material
Source: PubMed Central journal article supplement (PMC6783387)
Supplement: NIHMS1538270-supplement-1.pdf [file NIHMS1538270-supplement-1.pdf]

## Supplemental Material

**Supplemental Table 1. Boolean subset comparison across groups (Wilcoxon Rank Test Result)**

## 1. HIV+ CCR7, CD27, and CD45RA expression

| Category |      |        | P-value CD8 CD16+ vs. CD16- |
|----------|------|--------|-----------------------------|
| CCR7     | CD27 | CD45RA |                             |
| +        | +    | +      | <b>0.000</b>                |
| +        | +    | -      | <b>0.000</b>                |
| +        | -    | +      | <b>0.000</b>                |
| +        | -    | -      | <b>0.013</b>                |
| -        | +    | +      | <b>0.001</b>                |
| -        | +    | -      | <b>0.000</b>                |
| -        | -    | +      | <b>0.000</b>                |
| -        | -    | -      | <b>0.038</b>                |

## 2. HIV+ CD57, NKG2A, and NKG2D expression

| Category |       |       | P-value CD8 CD16+ vs. CD16- |
|----------|-------|-------|-----------------------------|
| CD57     | NKG2A | NKG2D |                             |
| +        | +     | +     | <b>0.000</b>                |
| +        | +     | -     | <b>0.001</b>                |
| +        | -     | +     | <b>0.000</b>                |
| +        | -     | -     | <b>0.000</b>                |
| -        | +     | +     | 0.281                       |
| -        | +     | -     | 0.130                       |
| -        | -     | +     | <b>0.000</b>                |
| -        | -     | -     | <b>0.000</b>                |

## 3. HIV+ Perforin and CD161 expression

| Category |       | P-value CD8 CD16+ vs. CD16- |
|----------|-------|-----------------------------|
| NKG2A    | NKG2D |                             |
| +        | +     | <b>0.000</b>                |
| +        | -     | <b>0.000</b>                |
| -        | +     | <b>0.000</b>                |
| -        | -     | <b>0.000</b>                |

## 4. HIV+ Transcription Factors (Eomesodermin, Helios, and T-

| Category |        |       | P-value CD8 CD16+ vs. CD16- | FDR of CD8 CD16+ vs. CD16- | P-value CD8 CD16+ vs. NK cell | FDR of CD8 CD16+ vs. NK cell |
|----------|--------|-------|-----------------------------|----------------------------|-------------------------------|------------------------------|
| Eomes    | Helios | T-bet |                             |                            |                               |                              |
| +        | +      | +     | <b>0.000</b>                | <b>0.001</b>               | <b>0.019</b>                  | <b>0.0338</b>                |
| +        | +      | -     | <b>0.028</b>                | <b>0.045</b>               | <b>0.000</b>                  | <b>0.0015</b>                |
| +        | -      | +     | <b>0.007</b>                | <b>0.014</b>               | <b>0.001</b>                  | <b>0.0023</b>                |
| +        | -      | -     | 0.112                       | 0.138                      | <b>0.000</b>                  | <b>0.0015</b>                |
| -        | +      | +     | <b>0.001</b>                | <b>0.002</b>               | <b>0.000</b>                  | <b>0.0015</b>                |
| -        | +      | -     | 0.880                       | 0.880                      | 0.496                         | 0.5669                       |
| -        | -      | +     | 0.059                       | 0.079                      | <b>0.049</b>                  | 0.0713                       |
| -        | -      | -     | <b>0.001</b>                | <b>0.002</b>               | 0.597                         | 0.6368                       |

## 5. HIV+ Killer Immunoglobulin receptor (KIR) Expression

| Category |            |         | P-value CD8+CD16+ vs. CD8+CD16- | FDR of CD8+CD16+ vs. CD8+CD16- | P-value CD8+CD16+ vs. CD8+CD45- | FDR of CD8+CD16+ vs. CD8+CD45- | P-value CD8+CD16+ vs. NK cell | FDR of CD8+CD16+ vs. NK cell |
|----------|------------|---------|---------------------------------|--------------------------------|---------------------------------|--------------------------------|-------------------------------|------------------------------|
| 2DL1/DS1 | 2DL2/3/DS2 | KIR3DL1 |                                 |                                |                                 |                                |                               |                              |
| +        | +          | +       | 0.208                           | 0.357                          | 0.462                           | 0.504                          | <b>0.001</b>                  | <b>0.005</b>                 |
| +        | +          | -       | 0.793                           | 0.827                          | 0.248                           | 0.372                          | <b>0.016</b>                  | <b>0.038</b>                 |
| +        | -          | +       | 0.916                           | 0.916                          | 0.401                           | 0.481                          | <b>0.001</b>                  | <b>0.005</b>                 |
| +        | -          | -       | 0.462                           | 0.504                          | 0.401                           | 0.481                          | <b>0.027</b>                  | 0.059                        |
| -        | +          | +       | 0.248                           | 0.372                          | 0.141                           | 0.260                          | <b>0.012</b>                  | <b>0.032</b>                 |
| -        | +          | -       | 0.093                           | 0.186                          | <b>0.001</b>                    | <b>0.005</b>                   | 0.294                         | 0.392                        |
| -        | -          | +       | <b>0.003</b>                    | <b>0.012</b>                   | <b>0.012</b>                    | <b>0.032</b>                   | 0.294                         | 0.392                        |
| -        | -          | -       | <b>0.005</b>                    | <b>0.017</b>                   | <b>0.001</b>                    | <b>0.005</b>                   | <b>0.001</b>                  | <b>0.005</b>                 |

## 6. CD8+CD16+ Killer Immunoglobulin receptor (KIR) Expressi

| Category |            |         | P-value HIV- vs. HIV+ |
|----------|------------|---------|-----------------------|
| 2DL1/DS1 | 2DL2/3/DS2 | KIR3DL1 |                       |
| +        | +          | +       | 0.058                 |
| +        | +          | -       | 0.142                 |
| +        | -          | +       | 0.270                 |
| +        | -          | -       | 0.426                 |
| -        | +          | +       | 0.298                 |
| -        | +          | -       | 0.178                 |
| -        | -          | +       | 0.951                 |
| -        | -          | -       | <b>0.006</b>          |

Supplemental Table 2. Gene expression RT-PCR reagents

| Gene symbol                              | Gene Name                                                                                | Entrez Gene ID | Assay ID      |
|------------------------------------------|------------------------------------------------------------------------------------------|----------------|---------------|
| CD226                                    | CD226 molecule                                                                           | 10666          | Hs00170832_m1 |
| EOME5                                    | omesodermin                                                                              | 8320           | Hs00172872_m1 |
| NCR1                                     | natural cytotoxicity triggering receptor 1                                               | 9437           | Hs00183118_m1 |
| KZ2F                                     | IKAROS family zinc finger 2 (Helios)                                                     | 22807          | Hs00212361_m1 |
| KLRF1                                    | killer cell lectin-like receptor subfamily F, member 1                                   | 51348          | Hs00212979_m1 |
| LAR1                                     | leukocyte-associated immunoglobulin-like receptor 1                                      | 3903           | Hs00253790_m1 |
| ITGAM                                    | integrin, alpha M (complement component 3 receptor 3 subunit)                            | 3684           | Hs00355805_m1 |
| KIR2DL4;LOC100287534                     | killer cell immunoglobulin-like receptor, two domains, long cytoplasmic tail, 4          | 3805           | Hs00427106_m1 |
|                                          | killer cell immunoglobulin-like receptor 2DL4-like                                       | 100287534      |               |
| KIR3DL2                                  | killer cell immunoglobulin-like receptor, three domains, long cytoplasmic tail, 2        | 3812           | Hs00601497_gH |
| KIR3DX1                                  | killer cell immunoglobulin-like receptor, three domains, X1                              | 90011          | Hs00736082_g1 |
| KIR3DL1;KIR3DS1                          | killer cell immunoglobulin-like receptor, three domains, long cytoplasmic tail, 1        | 3811           | Hs00744448_s1 |
|                                          | killer cell immunoglobulin-like receptor, three domains, short cytoplasmic tail, 1       | 3813           |               |
| IL7R                                     | interleukin 7 receptor                                                                   | 3575           | Hs00902334_m1 |
| KLRC1                                    | killer cell lectin-like receptor subfamily G, member 1                                   | 10219          | Hs00929964_m1 |
| IL2RG                                    | interleukin 2 receptor, gamma                                                            | 2561           | Hs0093624_m1  |
| KZ2F1                                    | IKAROS family zinc finger 1 (Ikaros)                                                     | 10320          | Hs00958474_m1 |
| IL18R1                                   | interleukin 18 receptor 1                                                                | 8809           | Hs00977691_m1 |
| IL18RAP                                  | interleukin 18 receptor accessory protein                                                | 8807           | Hs00977695_m1 |
| GZMA                                     | granzyme A (granzyme 1, cytotoxic T-lymphocyte-associated serine esterase 3)             | 3001           | Hs00989184_m1 |
| IFNG                                     | interferon, gamma                                                                        | 3458           | Hs00989291_m1 |
| TLR6                                     | toll-like receptor 6                                                                     | 10333          | Hs01039980_s1 |
| LAR2                                     | leukocyte-associated immunoglobulin-like receptor 2                                      | 3904           | Hs01102514_m1 |
| IL18R1                                   | leukocyte immunoglobulin-like receptor, subfamily B (with TM and ITIM domains), member 1 | 10859          | Hs01848117_s1 |
| KIR2DL3;KIR2DL2;KIR2DS2                  | killer cell immunoglobulin-like receptor, two domains, long cytoplasmic tail, 3          | 3804           | Hs03407415_gH |
|                                          | killer cell immunoglobulin-like receptor, two domains, long cytoplasmic tail, 2          | 3803           |               |
|                                          | killer cell immunoglobulin-like receptor, two domains, short cytoplasmic tail, 2         | 100132285      |               |
| KIR2DS2;KIR2DL5A;KIR2DL2;KIR2DL3;KIR2DS4 | killer cell immunoglobulin-like receptor, two domains, short cytoplasmic tail, 2         | 100132285      | Hs04190776_gH |
|                                          | killer cell immunoglobulin-like receptor, two domains, long cytoplasmic tail, 2          | 3803           |               |
|                                          | killer cell immunoglobulin-like receptor, two domains, long cytoplasmic tail, 3          | 3804           |               |
|                                          | killer cell immunoglobulin-like receptor, two domains, long cytoplasmic tail, 5A         | 57292          |               |
|                                          | killer cell immunoglobulin-like receptor, two domains, short cytoplasmic tail, 4         | 3809           |               |
| KIR2DS2;KIR2DS1;KIR2DS3;KIR2DL1;KIR2DS4  | killer cell immunoglobulin-like receptor, two domains, short cytoplasmic tail, 2         | 100132285      | Hs04190778_mH |
|                                          | killer cell immunoglobulin-like receptor, two domains, long cytoplasmic tail, 1          | 3802           |               |
|                                          | killer cell immunoglobulin-like receptor, two domains, short cytoplasmic tail, 1         | 3806           |               |
|                                          | killer cell immunoglobulin-like receptor, two domains, short cytoplasmic tail, 3         | 3808           |               |
|                                          | killer cell immunoglobulin-like receptor, two domains, short cytoplasmic tail, 4         | 3809           |               |
| KIR2DS3;KIR2DS5                          | killer cell immunoglobulin-like receptor, two domains, short cytoplasmic tail, 3         | 3808           | Hs04190781_mH |
|                                          | killer cell immunoglobulin-like receptor, two domains, short cytoplasmic tail, 3         | 3810           |               |
| KIR2DS3;KIR2DL2;KIR2DS2;KIR2DS5;KIR2DL3  | killer cell immunoglobulin-like receptor, two domains, short cytoplasmic tail, 3         | 3808           | Hs04190782_gH |
|                                          | killer cell immunoglobulin-like receptor, two domains, long cytoplasmic tail, 2          | 3803           |               |
|                                          | killer cell immunoglobulin-like receptor, two domains, long cytoplasmic tail, 3          | 3804           |               |
|                                          | killer cell immunoglobulin-like receptor, two domains, short cytoplasmic tail, 2         | 100132285      |               |
|                                          | killer cell immunoglobulin-like receptor, two domains, short cytoplasmic tail, 5         | 3810           |               |
| KLRC2;KLRC3                              | killer cell lectin-like receptor subfamily C, member 2                                   | 3822           | Hs04192492_gH |
|                                          | killer cell lectin-like receptor subfamily C, member 3                                   | 3823           |               |
| TNFSF10                                  | tumor necrosis factor (ligand) superfamily, member 10                                    | 8743           | Hs00921974_m1 |
| GZMK                                     | granzyme K (granzyme 3, tryptase II)                                                     | 3003           | Hs00157878_m1 |
| IL12RB1                                  | interleukin 12 receptor, beta 1                                                          | 3594           | Hs00538167_m1 |
| IL12RB2                                  | interleukin 12 receptor, beta 2                                                          | 3595           | Hs01548202_m1 |
| TLR8                                     | toll-like receptor 8                                                                     | 51311          | Hs00152972_m1 |
| LAMP1                                    | lysosomal-associated membrane protein 1                                                  | 3916           | Hs00174766_m1 |
| NCR2                                     | natural cytotoxicity triggering receptor 2                                               | 9436           | Hs00183113_m1 |
| KO5                                      | inducible T-cell co-stimulator                                                           | 29851          | Hs00899999_m1 |
| POC1                                     | programmed cell death 1                                                                  | 5123           | Hs01550088_m1 |
| TLR1                                     | toll-like receptor 1                                                                     | 7096           | Hs00413978_m1 |
| CD33                                     | CD33 molecule                                                                            | 945            | Hs01076281_m1 |
| CXCR1                                    | chemokine (C-X-C motif) receptor 1                                                       | 3577           | Hs00174146_m1 |
| TLR3                                     | toll-like receptor 3                                                                     | 7098           | Hs01551078_m1 |
| IL10                                     | interleukin 10                                                                           | 3586           | Hs00961622_m1 |
| TBX21                                    | T-box 21                                                                                 | 30009          | Hs00203436_m1 |
| CXCR3                                    | chemokine (C-X-C motif) receptor 3                                                       | 2833           | Hs00171041_m1 |
| KLRC1;KLRC4;KLRC1                        | killer cell lectin-like receptor subfamily K, member 1                                   | 22914          | Hs00183683_m1 |
|                                          | KLRC4-KLRC1 readthrough                                                                  | 100528032      |               |
| IRF7                                     | interferon regulatory factor 7                                                           | 3665           | Hs01014809_g1 |
| KLRC1                                    | killer cell lectin-like receptor subfamily C, member 1                                   | 3821           | Hs00970273_g1 |
| CCL3                                     | chemokine (C-C motif) ligand 3                                                           | 6348           | Hs00234142_m1 |
| IL18R2;IL18R1                            | leukocyte immunoglobulin-like receptor, subfamily B (with TM and ITIM domains), member 2 | 10288          | Hs00601427_g1 |
|                                          | leukocyte immunoglobulin-like receptor, subfamily B (with TM and ITIM domains), member 1 | 10859          |               |
| CCR7                                     | chemokine (C-C motif) receptor 7                                                         | 1226           | Hs01013469_m1 |
| MIG67                                    | antigen identified by monoclonal antibody Ki-67                                          | 4288           | Hs01032443_m1 |
| B3GAT1                                   | beta-1,3-glucuronyltransferase 1 (glucuronosyltransferase P)                             | 27087          | Hs00218629_m1 |
| BIRC3                                    | baculoviral IAP repeat containing 3                                                      | 330            | Hs00154109_m1 |
| CCL2                                     | chemokine (C-C motif) ligand 2                                                           | 6347           | Hs00234140_m1 |
| CCL4                                     | chemokine (C-C motif) ligand 4                                                           | 6351           | Hs09999148_m1 |
| CCL5                                     | chemokine (C-C motif) ligand 5                                                           | 6352           | Hs00174575_m1 |
| BC12                                     | B-cell CLL/lymphoma 2                                                                    | 596            | Hs09999018_m1 |
| CD244                                    | CD244 molecule, natural killer cell receptor 2B4                                         | 51744          | Hs00900771_m1 |
| CD38                                     | CD38 molecule                                                                            | 952            | Hs01120071_m1 |
| CD69                                     | CD69 molecule                                                                            | 969            | Hs00934033_m1 |
| CLEC2B                                   | C-type lectin domain family 2, member B                                                  | 9976           | Hs00192860_m1 |
| CTSB                                     | cathepsin B                                                                              | 1508           | Hs00947433_m1 |
| CXCR4                                    | chemokine (C-X-C motif) receptor 4                                                       | 7852           | Hs00237052_m1 |
| CXCR6                                    | chemokine (C-X-C motif) receptor 6                                                       | 10663          | Hs00174843_m1 |
| DPP4                                     | dipeptidyl-peptidase 4                                                                   | 1803           | Hs00175210_m1 |
| ENTPD1                                   | ectonucleoside triphosphate diphosphohydrolase 1                                         | 953            | Hs00969559_m1 |
| FASLG                                    | Fas ligand (TNF superfamily, member 6)                                                   | 356            | Hs00181225_m1 |
| CD160                                    | CD160 molecule                                                                           | 11126          | Hs00199894_m1 |
| GAPDH                                    | glyceraldehyde-3-phosphate dehydrogenase                                                 | 2597           | Hs09999905_m1 |
| GNL1                                     | granulysin                                                                               | 10578          | Hs00246266_m1 |
| GZMB                                     | granzyme B (granzyme 2, cytotoxic T-lymphocyte-associated serine esterase 1)             | 3002           | Hs01554355_m1 |
| HLA-DR                                   | major histocompatibility complex, class II, DR alpha                                     | 3122           | Hs00219575_m1 |
| IL16                                     | interleukin 16                                                                           | 3603           | Hs00189606_m1 |
| IL18R                                    | interleukin 21 receptor                                                                  | 50615          | Hs00232310_m1 |
| IL2Ra                                    | interleukin 2 receptor, alpha                                                            | 3559           | Hs00907777_m1 |
| IL6ST                                    | interleukin 6 signal transducer (gp130, oncostatin M receptor)                           | 3572           | Hs00174360_m1 |
| KLRD1                                    | killer cell lectin-like receptor subfamily D, member 1                                   | 3824           | Hs00233844_m1 |
| LGALS9                                   | lectin, galactoside-binding, soluble, 9                                                  | 3965           | Hs00371321_m1 |
| KLRF1                                    | killer cell lectin-like receptor subfamily F, member 1                                   | 51348          | Hs00212979_m1 |
| NCR3                                     | natural cytotoxicity triggering receptor 3                                               | 259197         | Hs00994809_m1 |
| POLR2A                                   | polymerase (RNA) II (DNA directed) polypeptide A, 220kDa                                 | 5430           | Hs00172187_m1 |
| PRDM1                                    | PR domain containing 1, with ZNF domain                                                  | 639            | Hs00333957_m1 |
| PRF1                                     | perforin 1 (pore forming protein)                                                        | 5551           | Hs00169473_m1 |
| PSMG2                                    | proteasome (prosome, macropain) assembly chaperone 2                                     | 56984          | Hs00220315_m1 |
| SLAMF5                                   | CD84 molecule                                                                            | 8832           | Hs01547121_m1 |
| SLAMF7                                   | SLAM family member 7                                                                     | 57823          | Hs00221793_m1 |
| SMAD4                                    | SMAD family member 4                                                                     | 4089           | Hs00232068_m1 |
| SPATA2                                   | spermatogenesis associated 2                                                             | 9825           | Hs00195835_m1 |
| TGFB1                                    | transforming growth factor, beta 1                                                       | 7040           | Hs00998133_m1 |
| IKZF7                                    | natural killer cell group 7 sequence                                                     | 4818           | Hs01320688_g1 |
| TGFB1                                    | transforming growth factor, beta receptor 1                                              | 7046           | Hs00610318_m1 |
| TIA1                                     | TIA1 cytotoxic granule-associated RNA binding protein                                    | 7072           | Hs00254561_m1 |
| TNF                                      | tumor necrosis factor                                                                    | 7124           | Hs00174128_m1 |
| TNFAIP3                                  | tumor necrosis factor, alpha-induced protein 3                                           | 7128           | Hs00234713_m1 |
| TNFRSF9                                  | tumor necrosis factor receptor superfamily, member 9                                     | 3604           | Hs00155512_m1 |
| TNFSF13B                                 | tumor necrosis factor (ligand) superfamily, member 13b                                   | 10673          | Hs00198106_m1 |

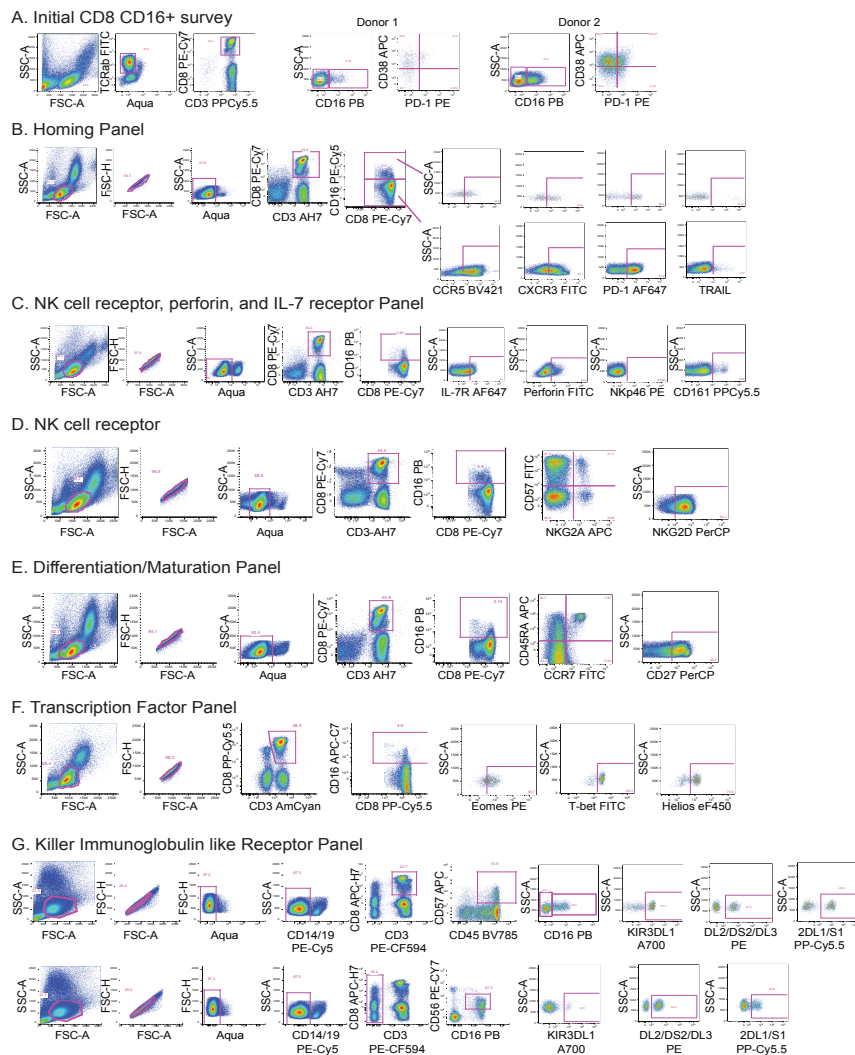

**Supplemental Figure 1.** Flow cytometry panels. Successive gating strategy used to characterize subpopulations of Fc $\gamma$ RIIIa-expressing cell subsets using 7 flow cytometry panels. Gating strategies began by first identifying small lymphocytes through forward and side scatter profiles, single cells, and dead cell exclusion using an amine reactive dye. An initial survey identified an expanded Fc $\gamma$ RIIIa<sup>+</sup>CD3<sup>+</sup>CD8<sup>+</sup> cell subset within HIV<sup>+</sup> donors, with differential PD-1 expression, as represented here (A). Five additional flow cytometry panels were designed to further characterize this subset. Homing markers were characterized in CD16 positive *versus* negative CD8 T cells, with CCR5, CXCR3, PD-1 and TRAIL gated individually within each CD16 expression subset (B). Additionally, CD16<sup>+</sup> CD8 T cells were screened for surface and intracellular NK cell, innate-like markers through individual gating of IL-7R, Perforin, Nkp46, and CD161 (C), single gating on NKG2D, and all combinations of NKG2A and CD57, individually or together (D). CD16<sup>+</sup> CD8 T cells were also characterized for their differentiation and maturation markers through single gating on CD27, or all combinations of CD45RA and CCR7 (E). Transcription factors T-bet, Eomes, and Helios were characterized alone or in combination within CD16<sup>+</sup> CD8 T cells, CD16<sup>-</sup> CD8 T cells, as well as CD56<sup>dim</sup> Fc $\gamma$ RIIIa<sup>+</sup> NK cells (F). Finally, surface KIR3DL1, KIR2DL2/3, and KIR2DL1/S1 expression was measured in Fc $\gamma$ RIIIa<sup>+</sup> CD8 T cells and NK cells. CD8 T cells were gated on as CD3<sup>+</sup>CD8<sup>+</sup> T cells, enriched for late-stage effector phenotype by gating on CD57<sup>+</sup>CD45<sup>+</sup> cells, and further gated as CD16<sup>+</sup>. NK cells were identified by their CD3 negativity, followed by gating on CD56<sup>dim</sup>CD16<sup>+</sup> cells. All KIR gates were drawn as individual gates (G).

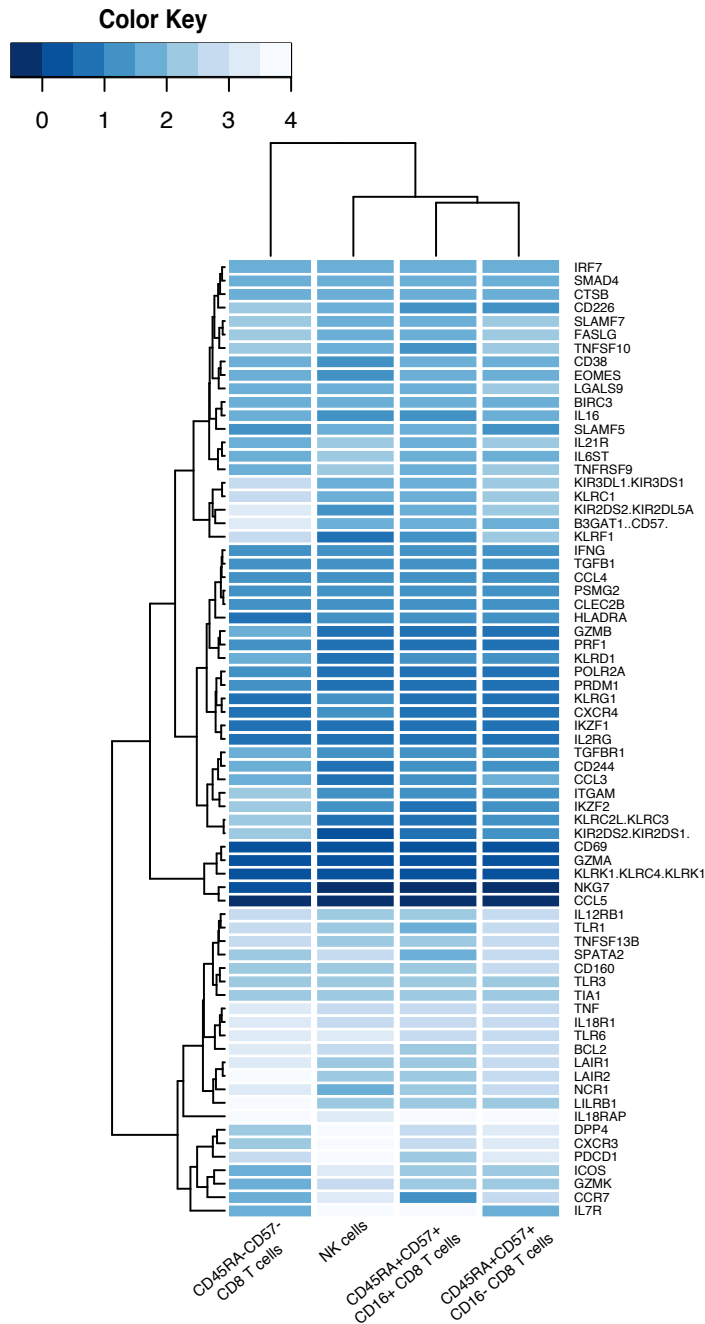

**Supplemental Figure 2. Hierarchical clustering of gene expression in sorted cell subsets.** Two-way hierarchical clustering of gene expression in sorted subsets of CD8 T cells; CD45RA-CD57-, CD45RA+CD57+FcyRIIIA-, CD45RA+CD57+FcyRIIIA+, as well as CD56dim FcyRIIIA+ NK cells. Data is normalized  $2^{-\Delta Ct}$  values.
